# Supplementary material for: Lavandula angustifolia Essential Oils as Effective Enhancers of Fluconazole Antifungal Activity against Candida albicans
Source: MDPI journal article supplement (doi:10.3390/molecules28031176), 2023-01-25
Supplement: s1 [file s1]

## **PART I - Retention parameters of *Lavandula angustifolia* essential oils components**

**Table S1.** Retention parameters of compounds identified in essential oils from flowers and leafy stalks of *Lavandula angustifolia* cultivars: ‘Blue River’ and ‘Ellagance Purple’, obtained by GC-MS method

| Compound                              | Retention time<br>RT [min] | Retention index <sup>1</sup><br>RI | Reference retention index <sup>2</sup><br>RI <sub>Ref</sub> |
|---------------------------------------|----------------------------|------------------------------------|-------------------------------------------------------------|
| $\alpha$ -Pinene                      | 4.89                       | 934                                | 936                                                         |
| Camphene                              | 5.23                       | 947                                | 950                                                         |
| $\beta$ -Pinene                       | 5.94                       | 976                                | 977                                                         |
| 3-Octanone                            | 6.39                       | 980                                | 980                                                         |
| $\beta$ -Myrcene                      | 6.77                       | 989                                | 989                                                         |
| Hexyl acetate                         | 6.81                       | 1009                               | 1010                                                        |
| Car-3-ene                             | 6.84                       | 1010                               | 1011                                                        |
| <i>p</i> -Cymene                      | 7.25                       | 1021                               | 1024                                                        |
| Limonene                              | 7.31                       | 1028                               | 1029                                                        |
| Eucalyptol                            | 7.38                       | 1031                               | 1031                                                        |
| <i>trans</i> - $\beta$ -Ocimene       | 7.76                       | 1036                               | 1038                                                        |
| <i>cis</i> - $\beta$ -Ocimene         | 8.16                       | 1045                               | 1048                                                        |
| <i>cis</i> -Linalool oxide            | 8.64                       | 1074                               | 1075                                                        |
| <i>trans</i> -Linalool oxide          | 9.09                       | 1084                               | 1085                                                        |
| Linalool                              | 9.50                       | 1102                               | 1099                                                        |
| 1-Octen-3-ol acetate                  | 9.84                       | 1110                               | 1110                                                        |
| Pinocarveol                           | 10.61                      | 1139                               | 1140                                                        |
| Camphor                               | 10.67                      | 1142                               | 1144                                                        |
| Borneol                               | 11.30                      | 1165                               | 1166                                                        |
| 4-Terpineol                           | 11.65                      | 1177                               | 1177                                                        |
| <i>p</i> -Cymene-8-ol                 | 11.92                      | 1184                               | 1184                                                        |
| Cryptone                              | 11.97                      | 1187                               | 1187                                                        |
| $\alpha$ -Terpineol                   | 12.10                      | 1190                               | 1191                                                        |
| Myrtenal                              | 12.20                      | 1194                               | 1194                                                        |
| Myrtenol                              | 12.26                      | 1198                               | 1196                                                        |
| Eucarvone                             | 12.84                      | 1201                               | 1199                                                        |
| Chrysanthenone                        | 13.00                      | 1210                               | -                                                           |
| Carveol                               | 13.46                      | 1225                               | 1224                                                        |
| Nerol                                 | 13.49                      | 1229                               | 1230                                                        |
| Cuminal                               | 13.74                      | 1237                               | 1236                                                        |
| Neral                                 | 13.75                      | 1239                               | 1240                                                        |
| Carvon                                | 13.79                      | 1244                               | 1242                                                        |
| Linalool acetate                      | 13.85                      | 1256                               | 1256                                                        |
| Phellandral                           | 14.57                      | 1276                               | 1277                                                        |
| Bornyl acetate                        | 14.62                      | 1279                               | 1282                                                        |
| Lavandulol acetate                    | 14.81                      | 1288                               | 1291                                                        |
| Cuminol                               | 15.65                      | 1292                               | 1295                                                        |
| Nerol acetate                         | 16.76                      | 1360                               | 1364                                                        |
| Geraniol acetate                      | 17.25                      | 1378                               | 1380                                                        |
| Caryophyllene                         | 18.06                      | 1417                               | 1421                                                        |
| $\alpha$ -Santalene                   | 18.08                      | 1420                               | 1422                                                        |
| $\alpha$ -Bergamotene                 | 18.50                      | 1430                               | 1434                                                        |
| $\beta$ -Farnesene                    | 19.07                      | 1453                               | 1456                                                        |
| Germacrene D                          | 19.68                      | 1478                               | 1480                                                        |
| $\delta$ -Cadinene                    | 20.44                      | 1519                               | 1522                                                        |
| Caryophyllene oxide                   | 22.08                      | 1579                               | 1577                                                        |
| <i>epi</i> -Bicyclosesquiphellandrene | 23.42                      | 1640                               | 1642                                                        |

<sup>1</sup> Linear retention index determined experimentally in relation to n-alkanes (C<sub>7</sub>-C<sub>30</sub>) on a HP5-MSI column;

<sup>2</sup> Reference linear retention index from the literature: Babushok, V.I., Linstrom, P.J., Zenkevich, I.G. (2011). *Retention indices for frequently reported compounds of plant essential oils*. J. Phys. Chem. Ref. Data. 40(4): 1-47.

## **PART II - GC-MS data of *Lavandula angustifolia* essential oils**

### **Total Ion Chromatograms obtained by GC-MS method:**

**Figure S1.** Chromatogram of essential oil from flowers of 'Blue River' cultivar of *Lavandula angustifolia*

**Figure S2.** Chromatogram of essential oil from flowers of 'Ellagance Purple' cultivar of *Lavandula angustifolia*

**Figure S3.** Chromatogram of essential oil from leafy stalks of 'Blue River' cultivar of *Lavandula angustifolia*

**Figure S4.** Chromatogram of essential oil from leafy stalks of 'Ellagance Purple' cultivar of *Lavandula angustifolia*

### **Mass spectra of the main components of essential oils:**

**Figure S5.** Mass spectrum of eucalyptol present in *Lavandula angustifolia* essential oils, compared with eucalyptol standard mass spectrum from NIST 02 library

**Figure S6.** Mass spectrum of linalool present in *Lavandula angustifolia* essential oils, compared with linalool standard mass spectrum from NIST 02 library

**Figure S7.** Mass spectrum of borneol present in *Lavandula angustifolia* essential oils, compared with borneol standard mass spectrum from NIST 02 library

**Figure S8.** Mass spectrum of linalool acetate present in *Lavandula angustifolia* essential oils, compared with linalool acetate standard mass spectrum from NIST 02 library

**Figure S9.** Mass spectrum of lavandulol acetate present in *Lavandula angustifolia* essential oils, compared with lavandulol acetate standard mass spectrum from NIST 02 library

**Figure S10.** Mass spectrum of caryophyllene present in *Lavandula angustifolia* essential oils, compared with caryophyllene standard mass spectrum from NIST 02 library

**Figure S11.** Mass spectrum of caryophyllene oxide present in *Lavandula angustifolia* essential oils, compared with caryophyllene oxide standard mass spectrum from NIST 02 library

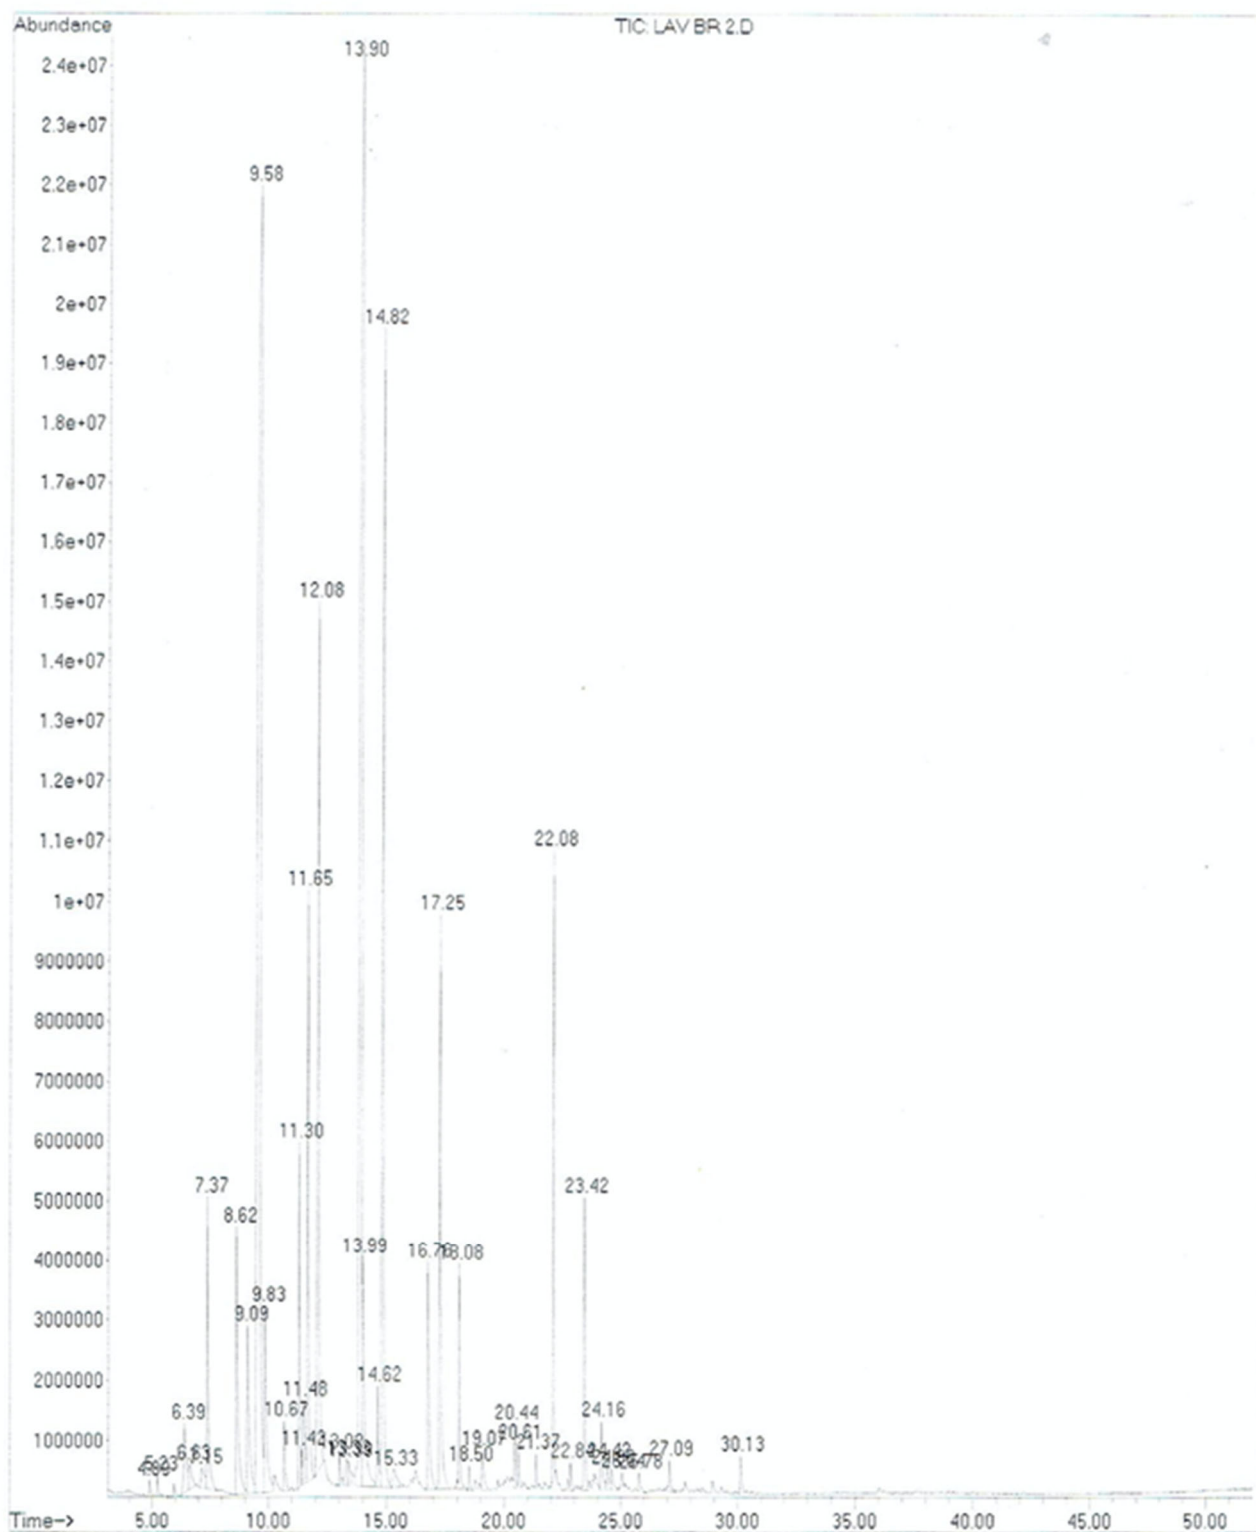

**Figure S1.** Chromatogram of essential oil from flowers of 'Blue River' cultivar of *Lavandula angustifolia*

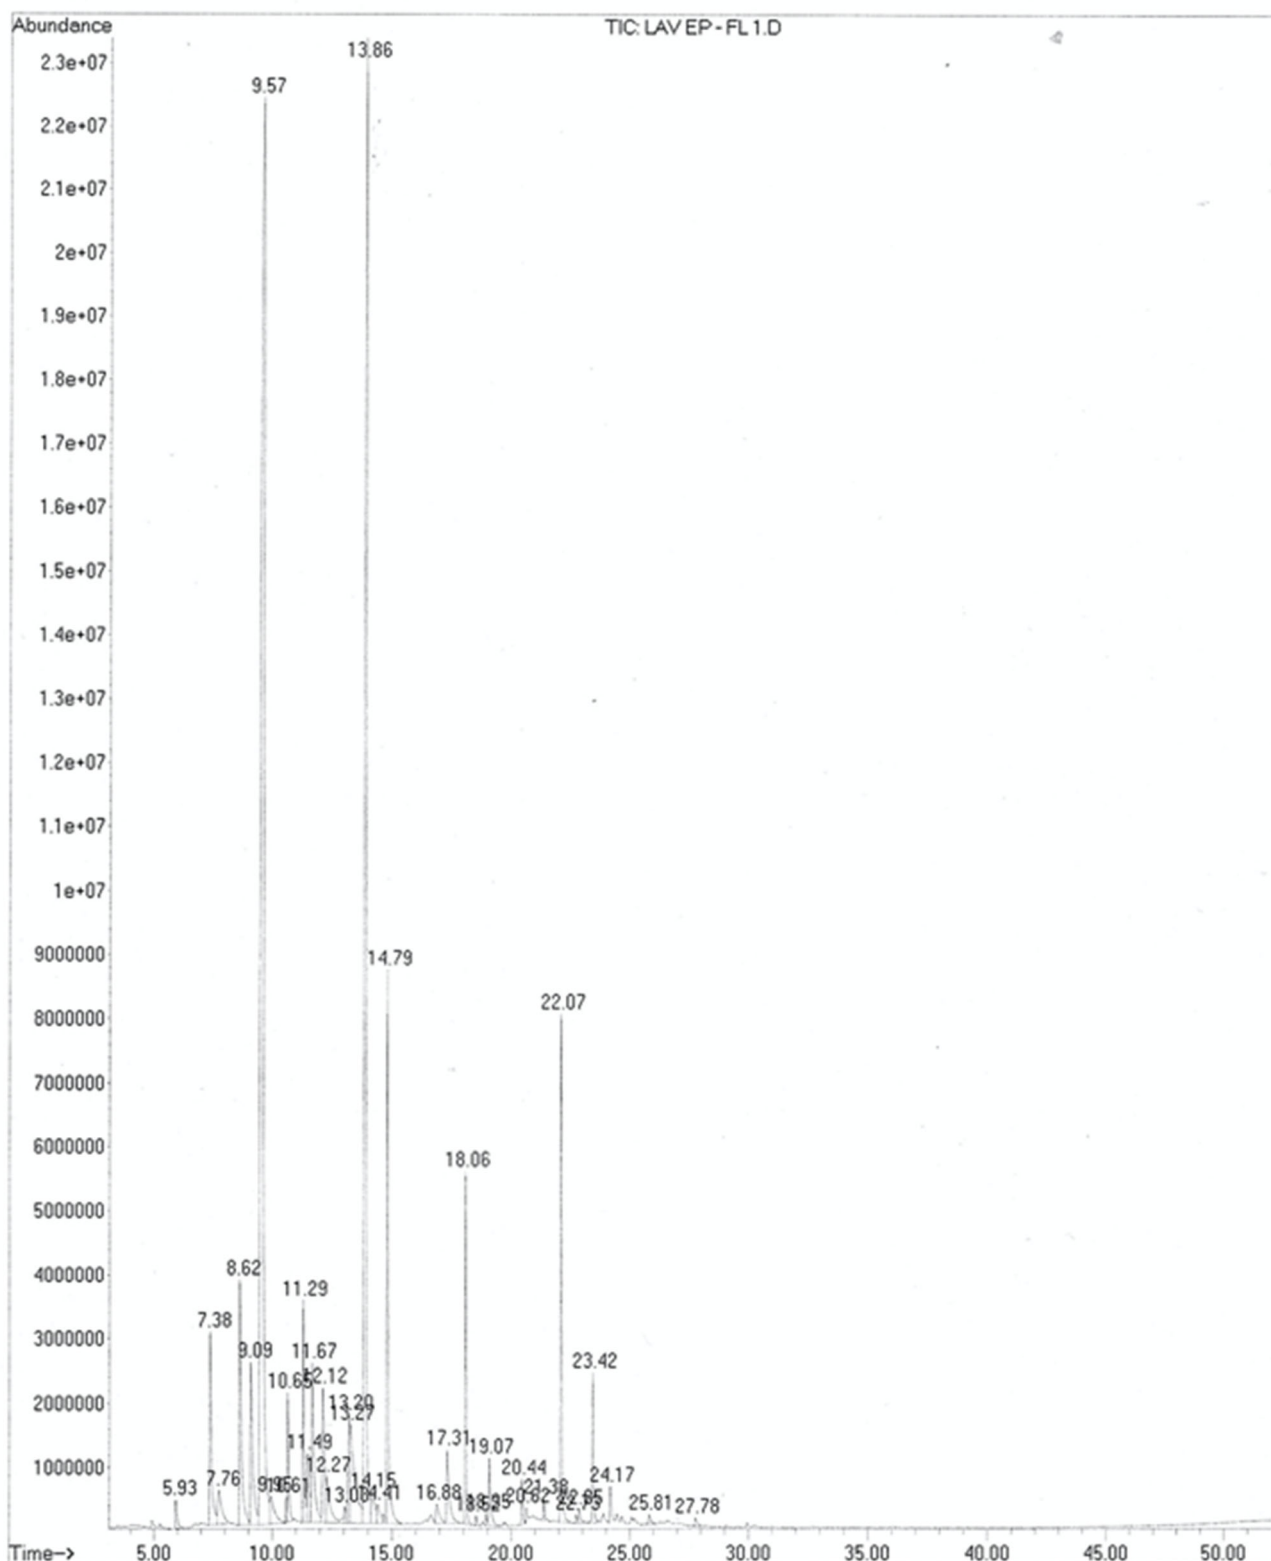

**Figure S2.** Chromatogram of essential oil from flowers of 'Ellagance Purple' cultivar of *Lavandula angustifolia*

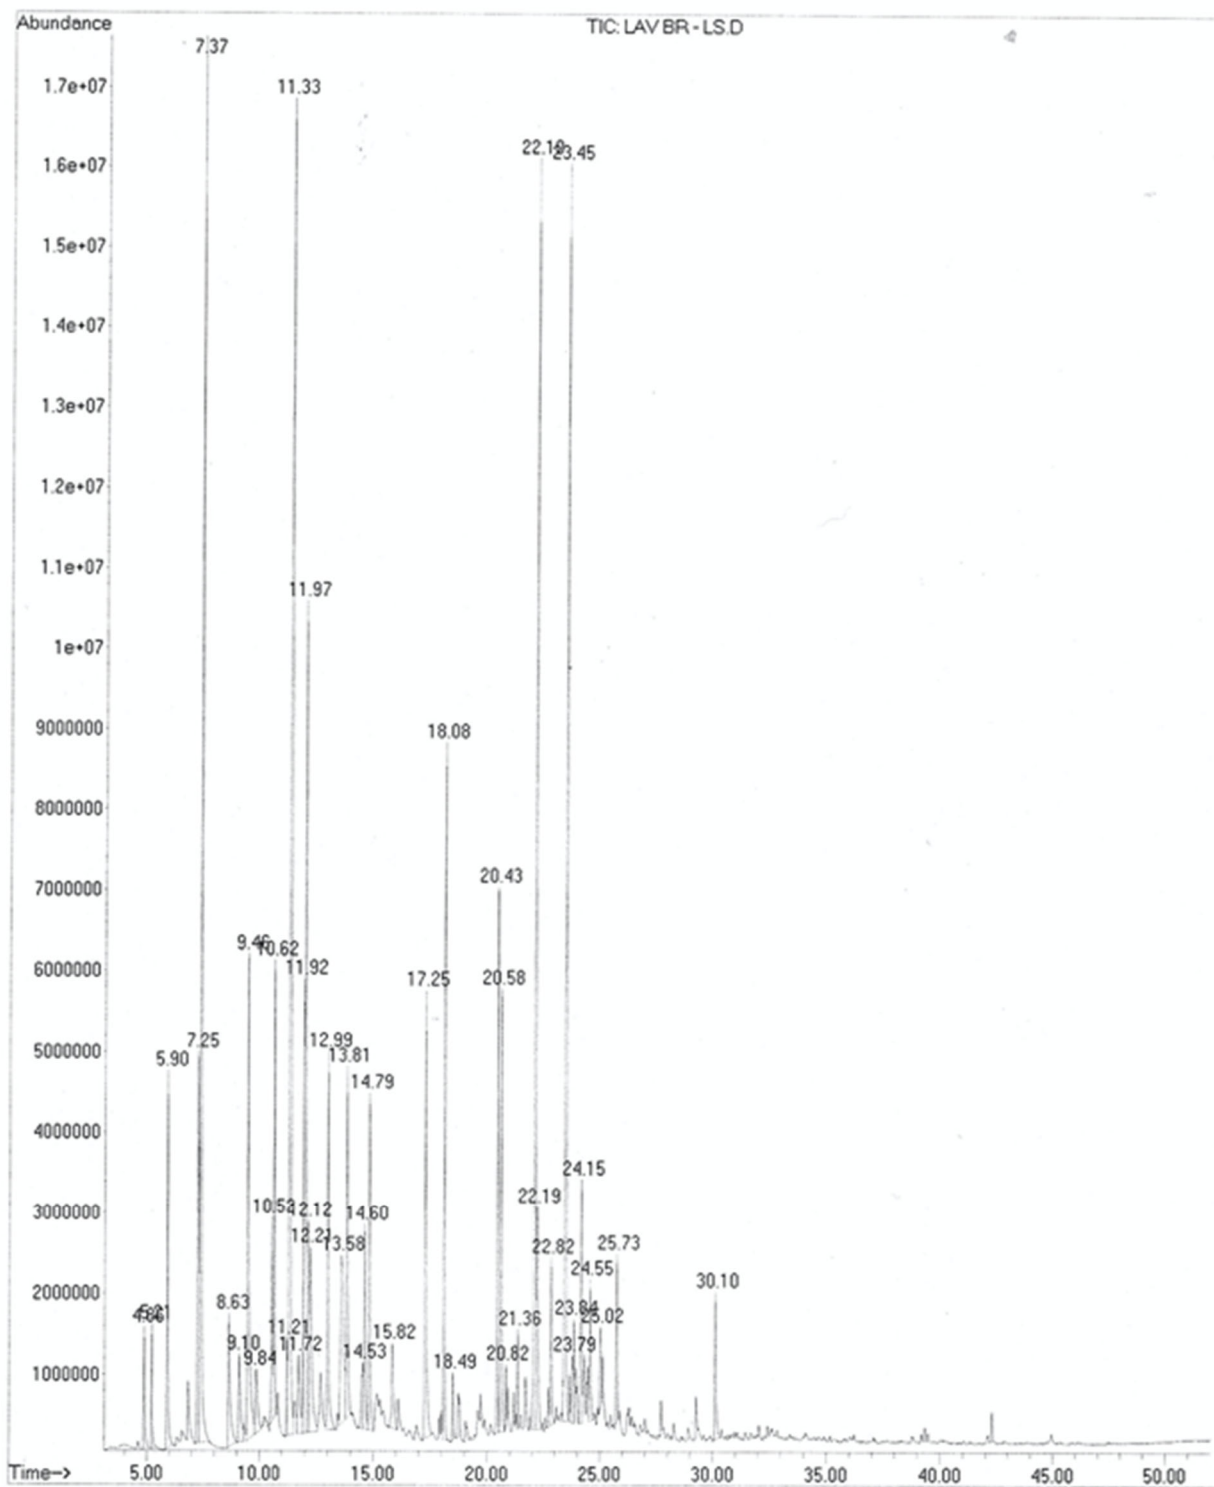

**Figure S3.** Chromatogram of essential oil from leafy stalks of 'Blue River' cultivar of *Lavandula angustifolia*

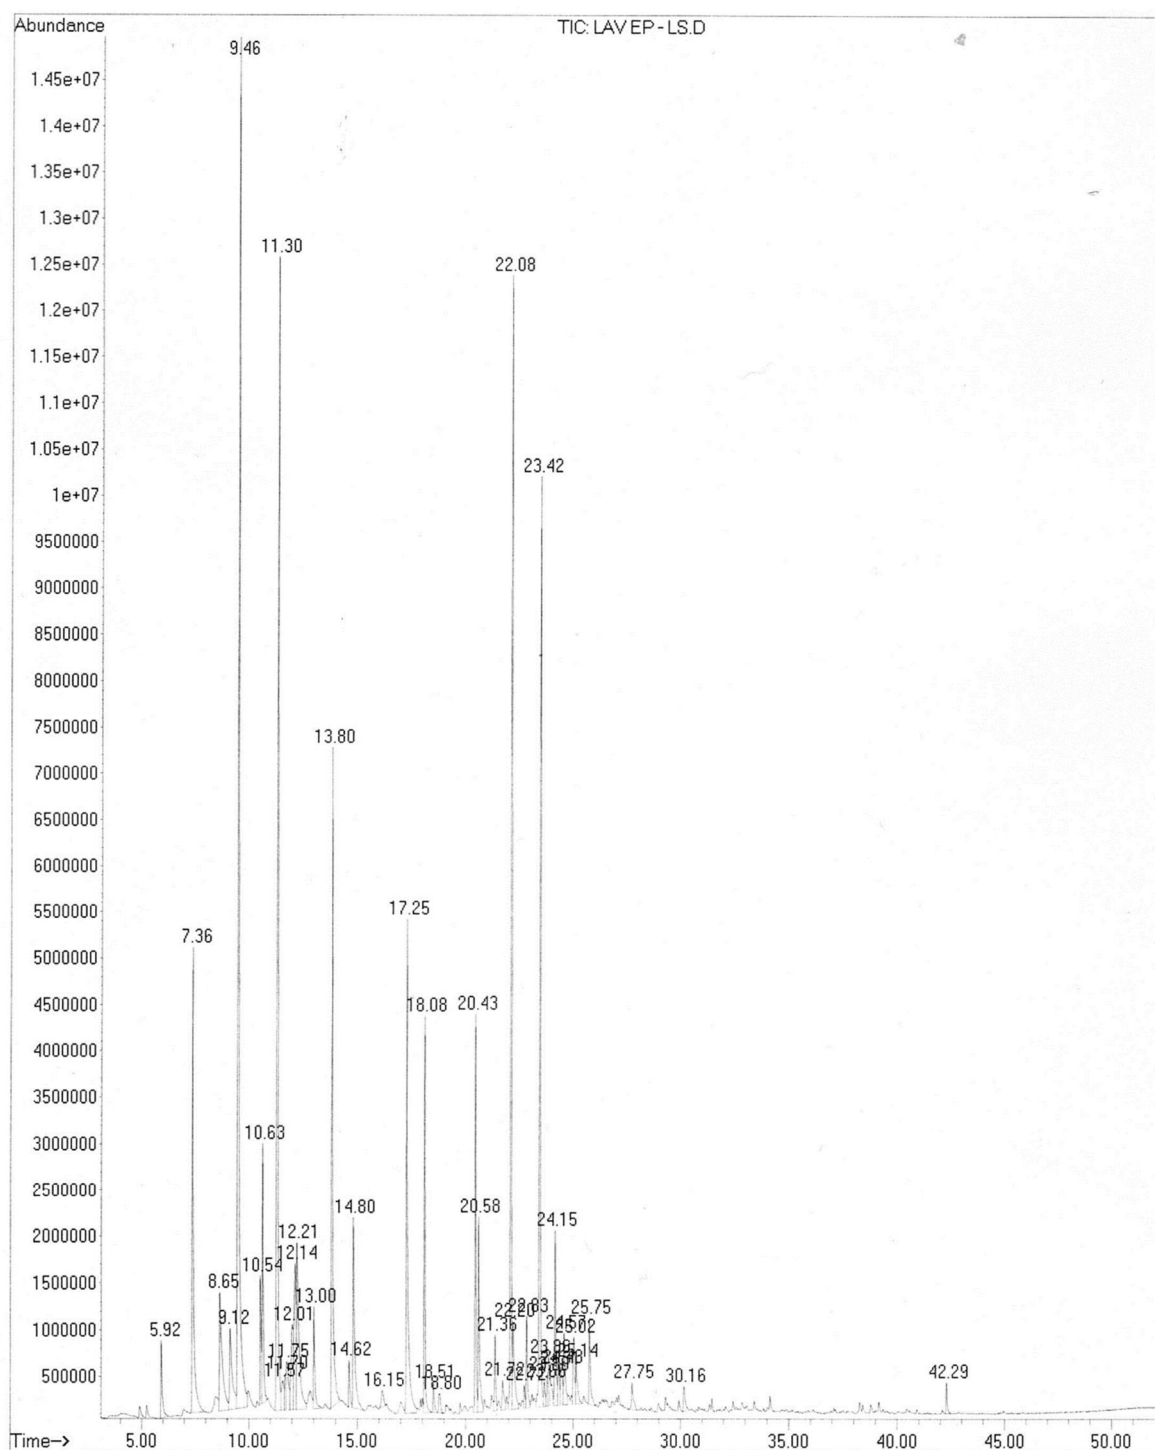

**Figure S4.** Chromatogram of essential oil from leafy stalks of 'Ellagance Purple' cultivar of *Lavandula angustifolia*

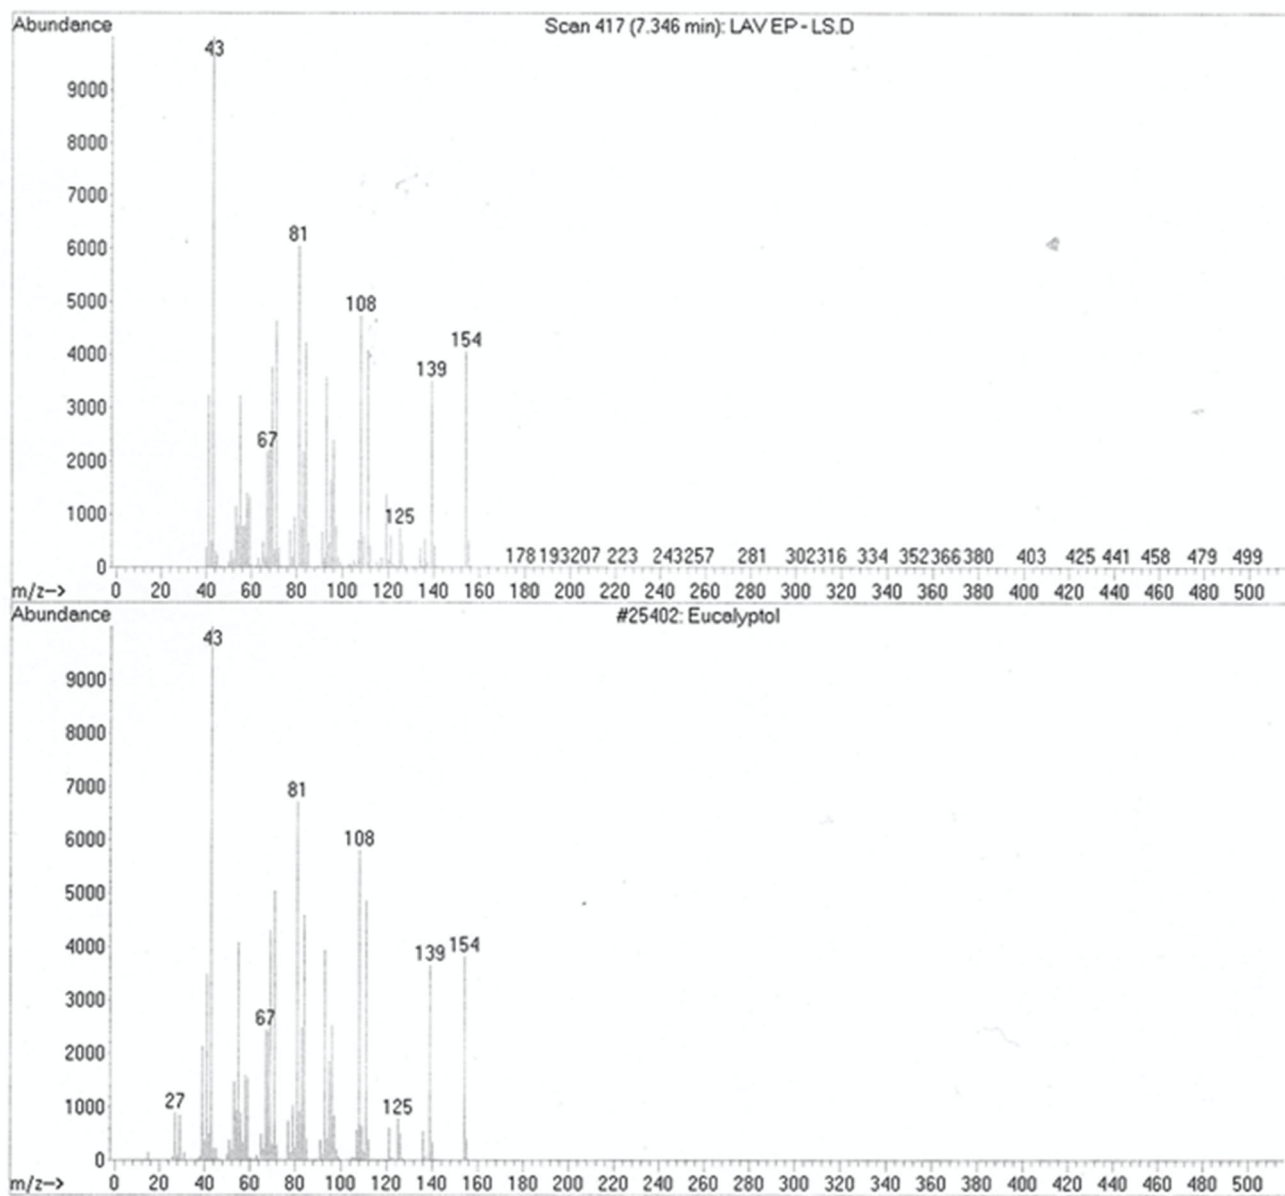

**Figure S5.** Mass spectrum of eucalyptol present in *Lavandula angustifolia* essential oils, compared with eucalyptol standard mass spectrum from NIST 02 library

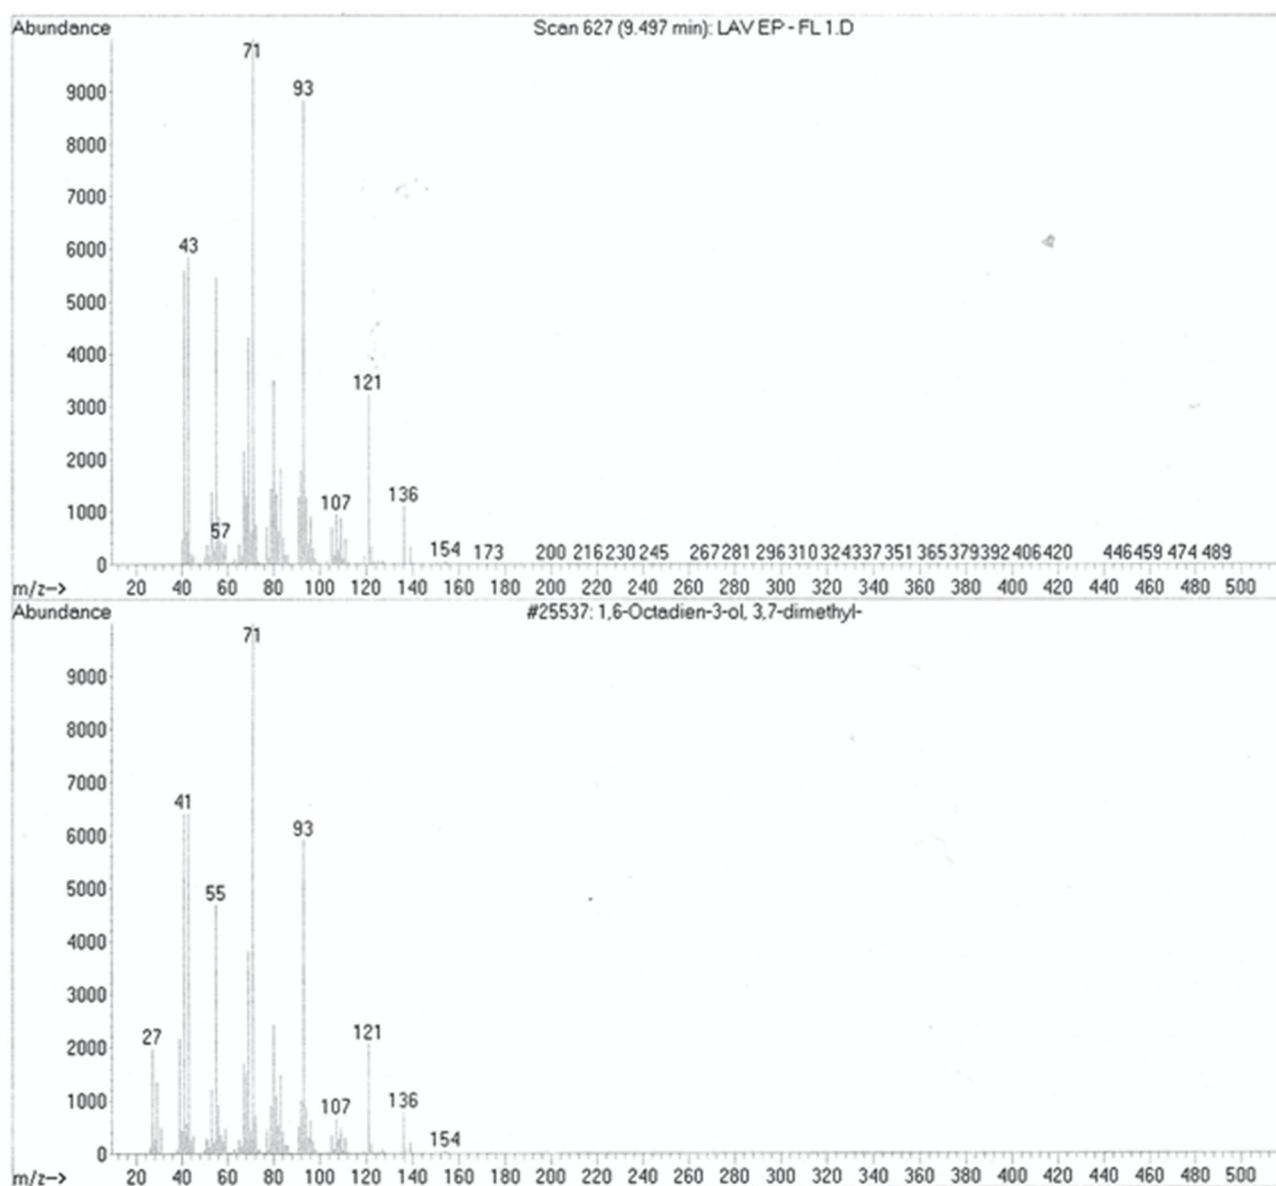

**Figure S6.** Mass spectrum of linalool present in *Lavandula angustifolia* essential oils, compared with linalool standard mass spectrum from NIST 02 library



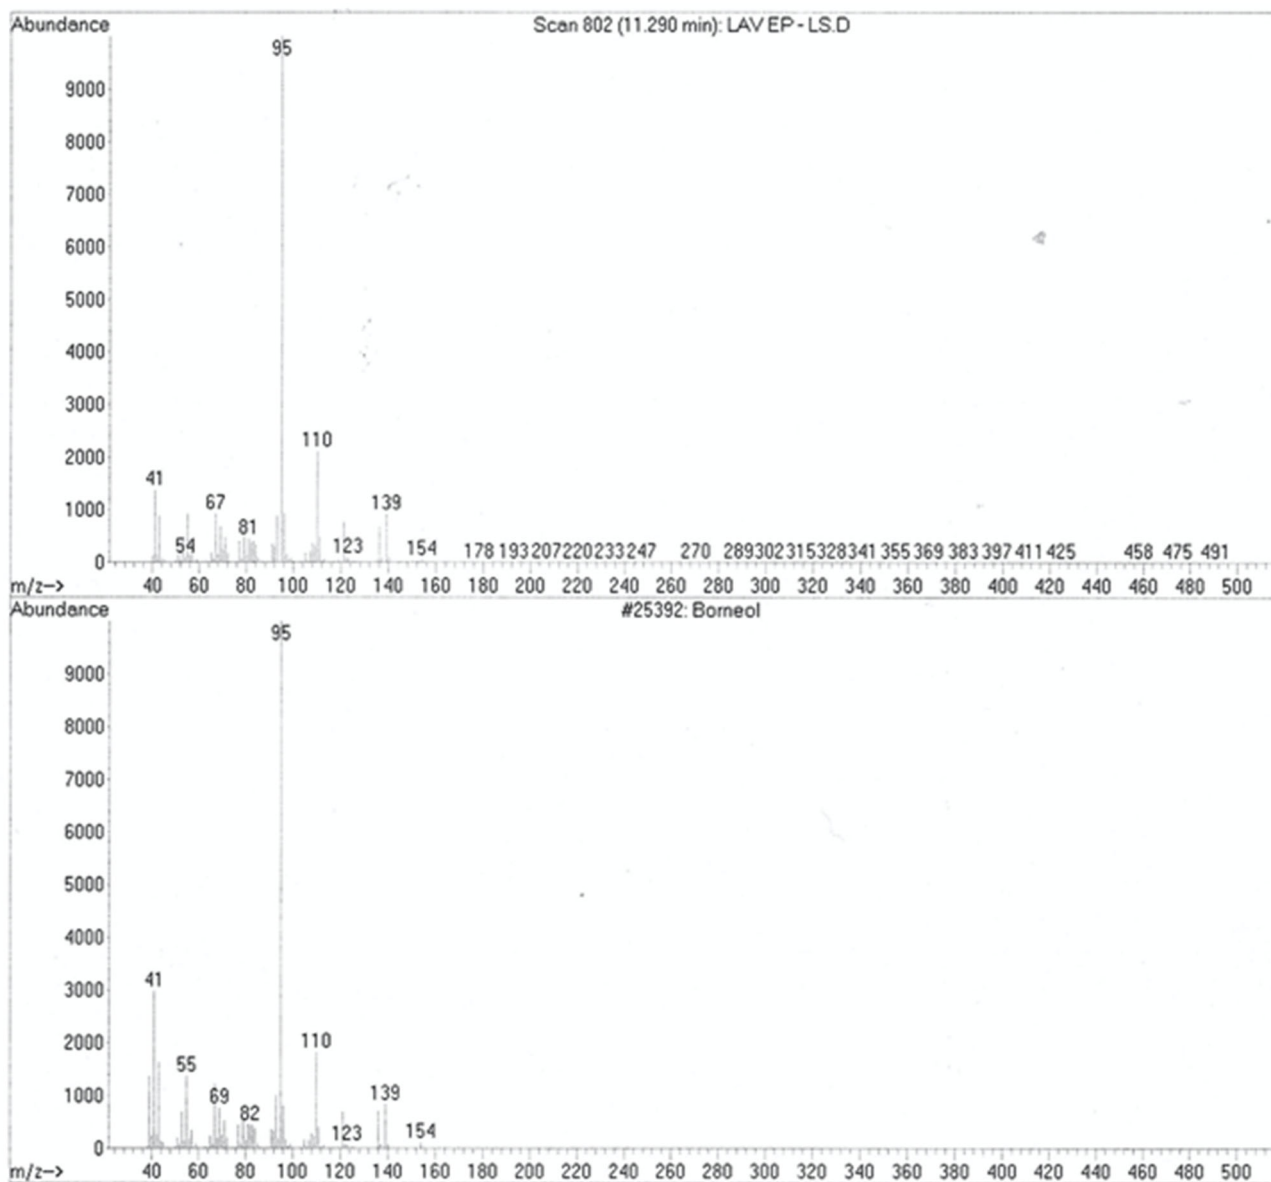

**Figure S7.** Mass spectrum of borneol present in *Lavandula angustifolia* essential oils, compared with borneol standard mass spectrum from NIST 02 library

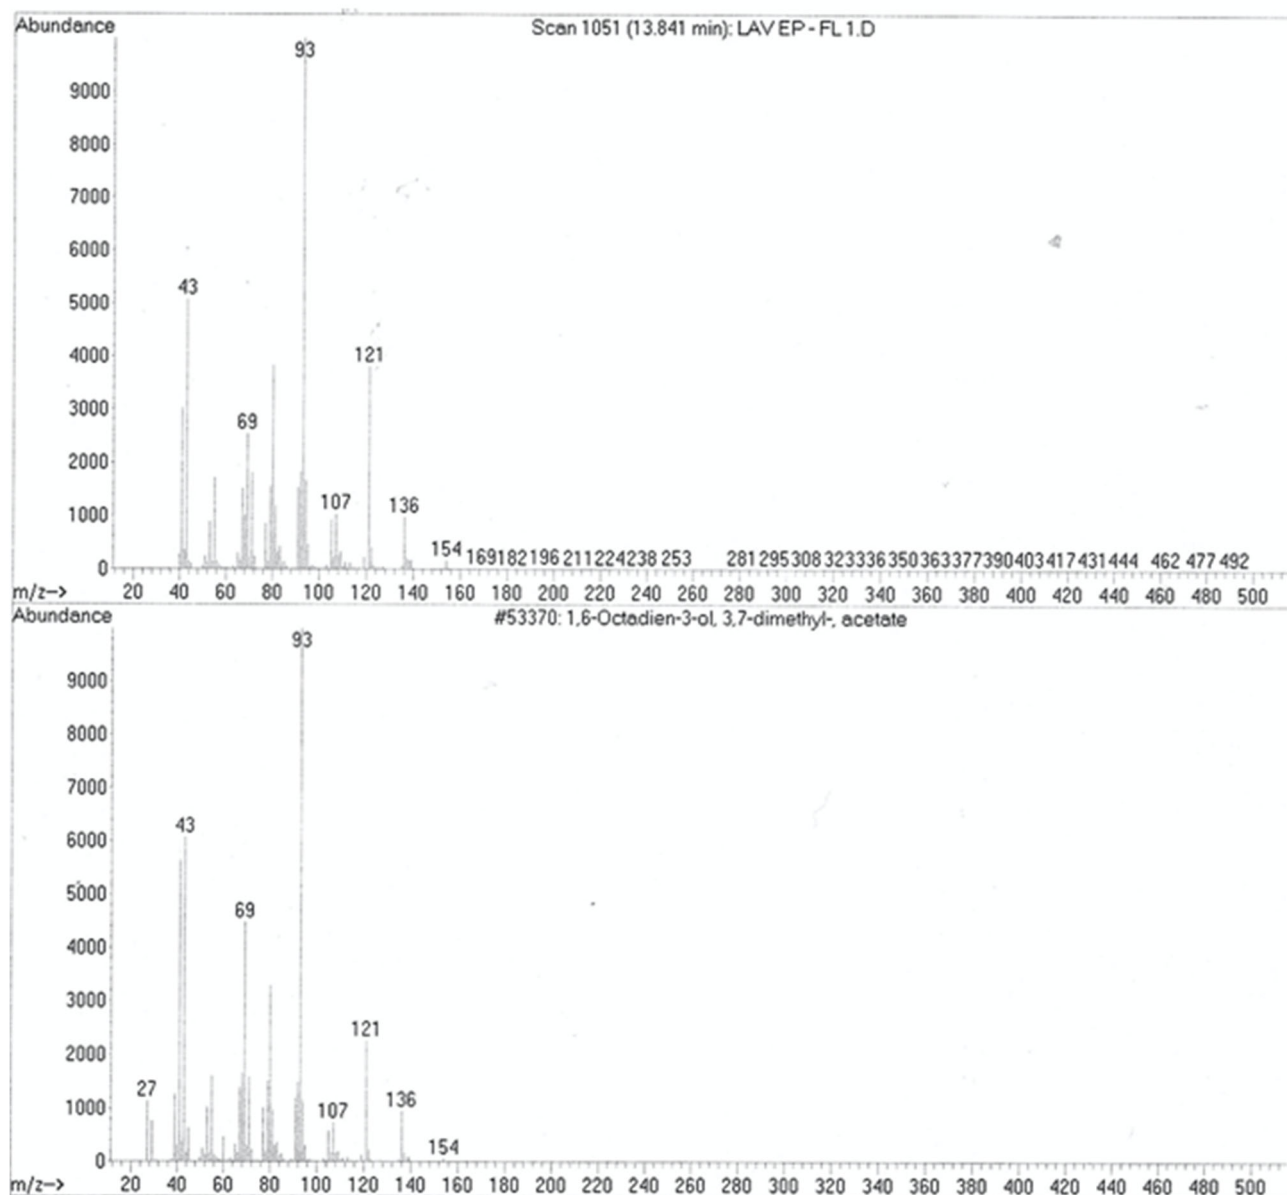

**Figure S8.** Mass spectrum of linalool acetate present in *Lavandula angustifolia* essential oils, compared with linalool acetate standard mass spectrum from NIST 02 library

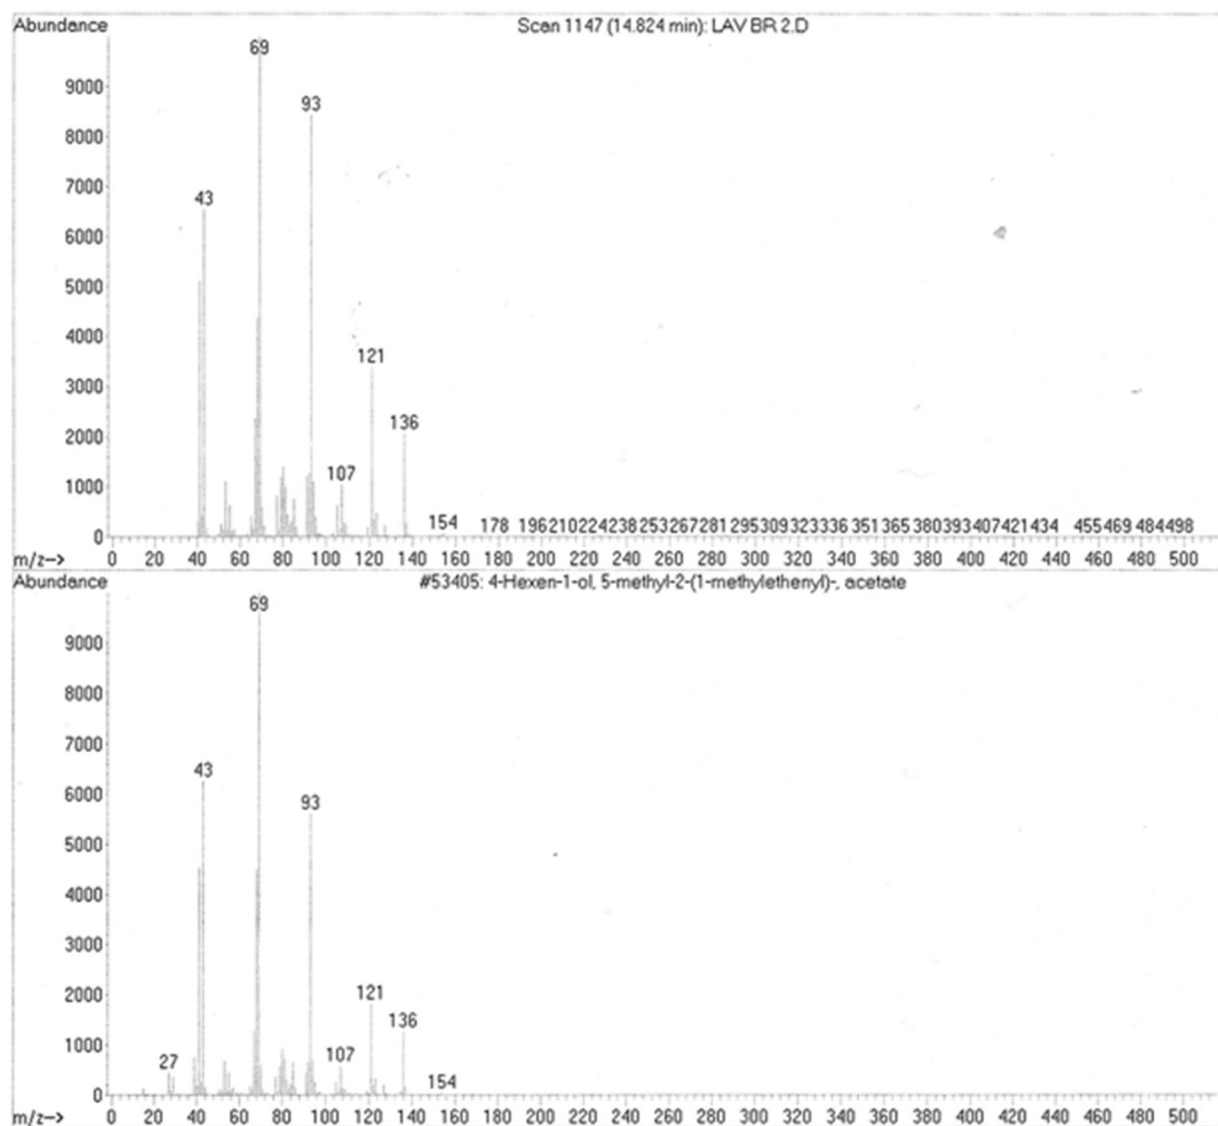

**Figure S9.** Mass spectrum of lavandulol acetate present in *Lavandula angustifolia* essential oils, compared with lavandulol acetate standard mass spectrum from NIST 02 library

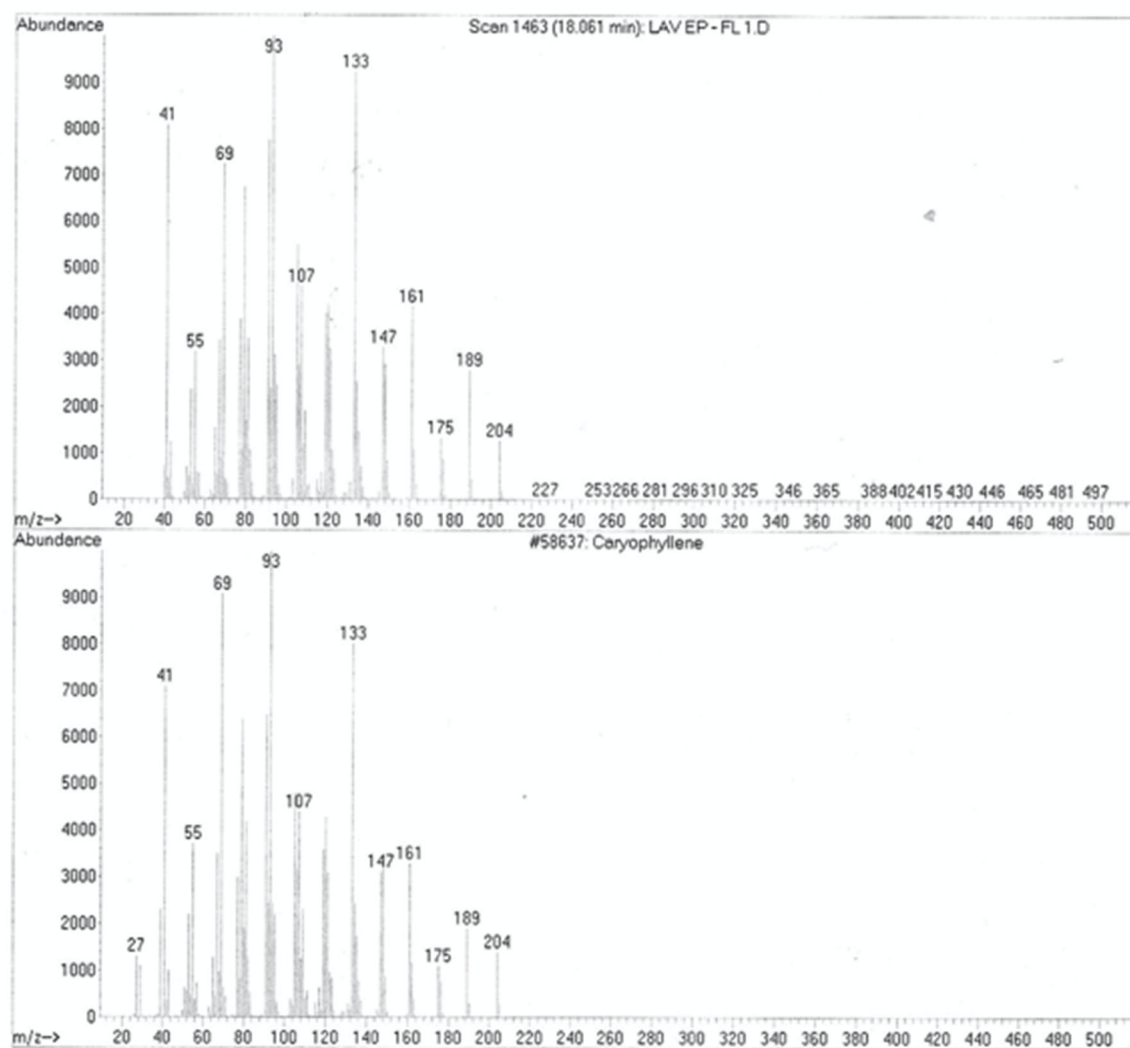

**Figure S10.** Mass spectrum of caryophyllene present in *Lavandula angustifolia* essential oils, compared with caryophyllene standard mass spectrum from NIST 02 library

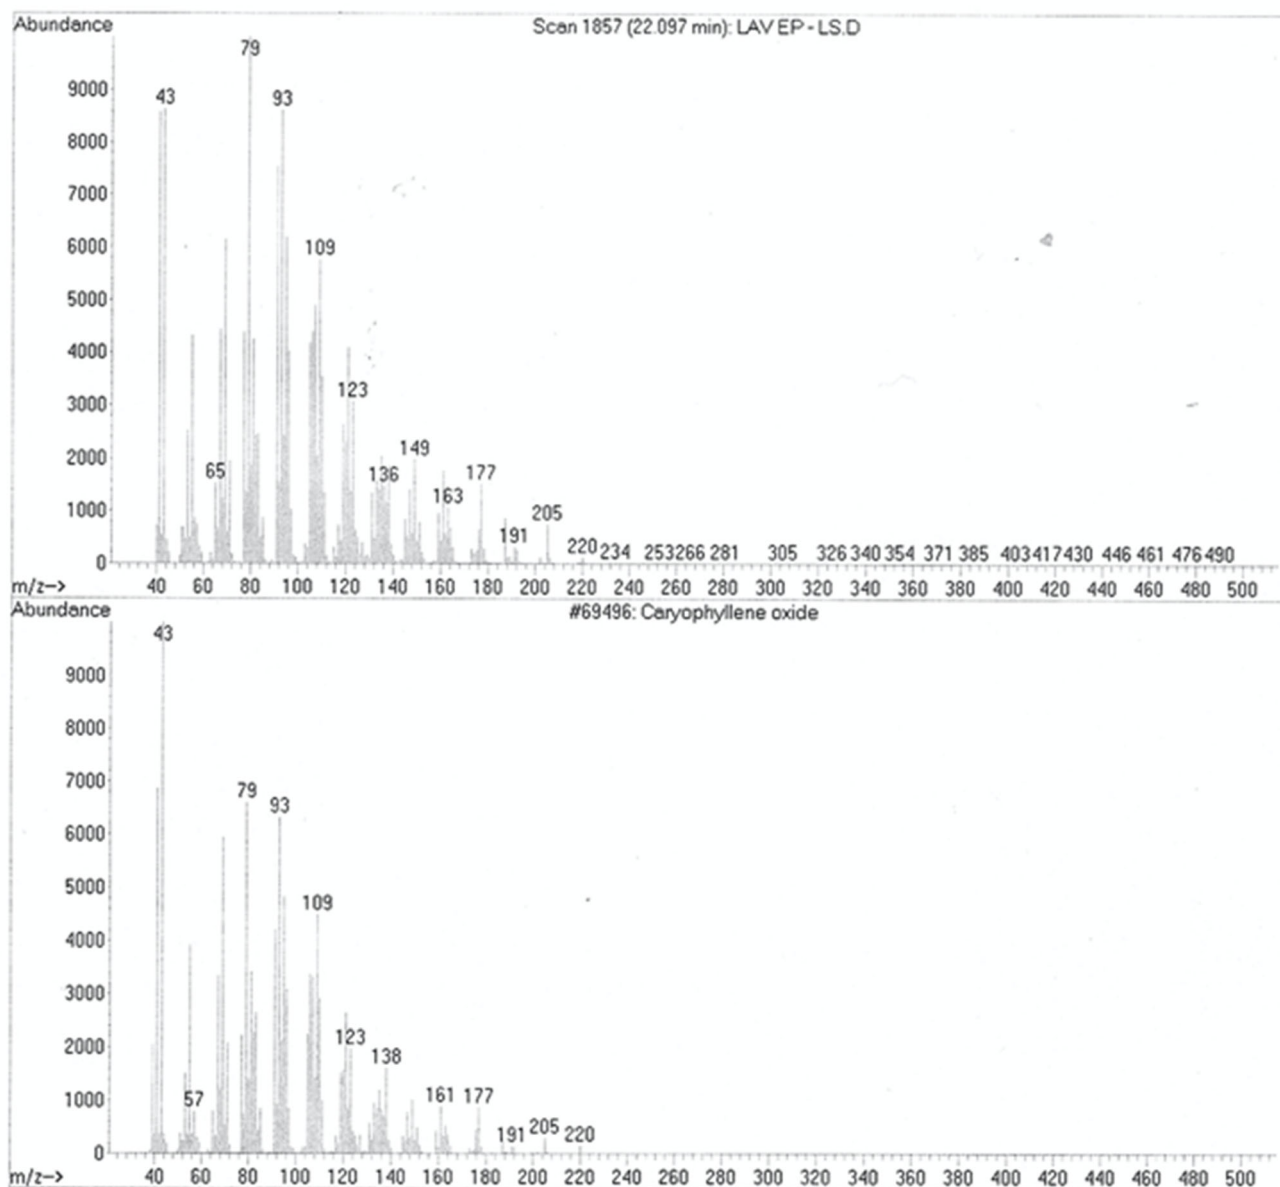

**Figure S11.** Mass spectrum of caryophyllene oxide present in *Lavandula angustifolia* essential oils, compared with caryophyllene oxide standard mass spectrum from NIST 02 library

### PART III - GC-MS data of linalool standard

**Figure S12.** Chromatogram of linalool standard

**Figure S13.** Mass spectrum of linalool, compared with linalool standard mass spectrum from NIST 02 library

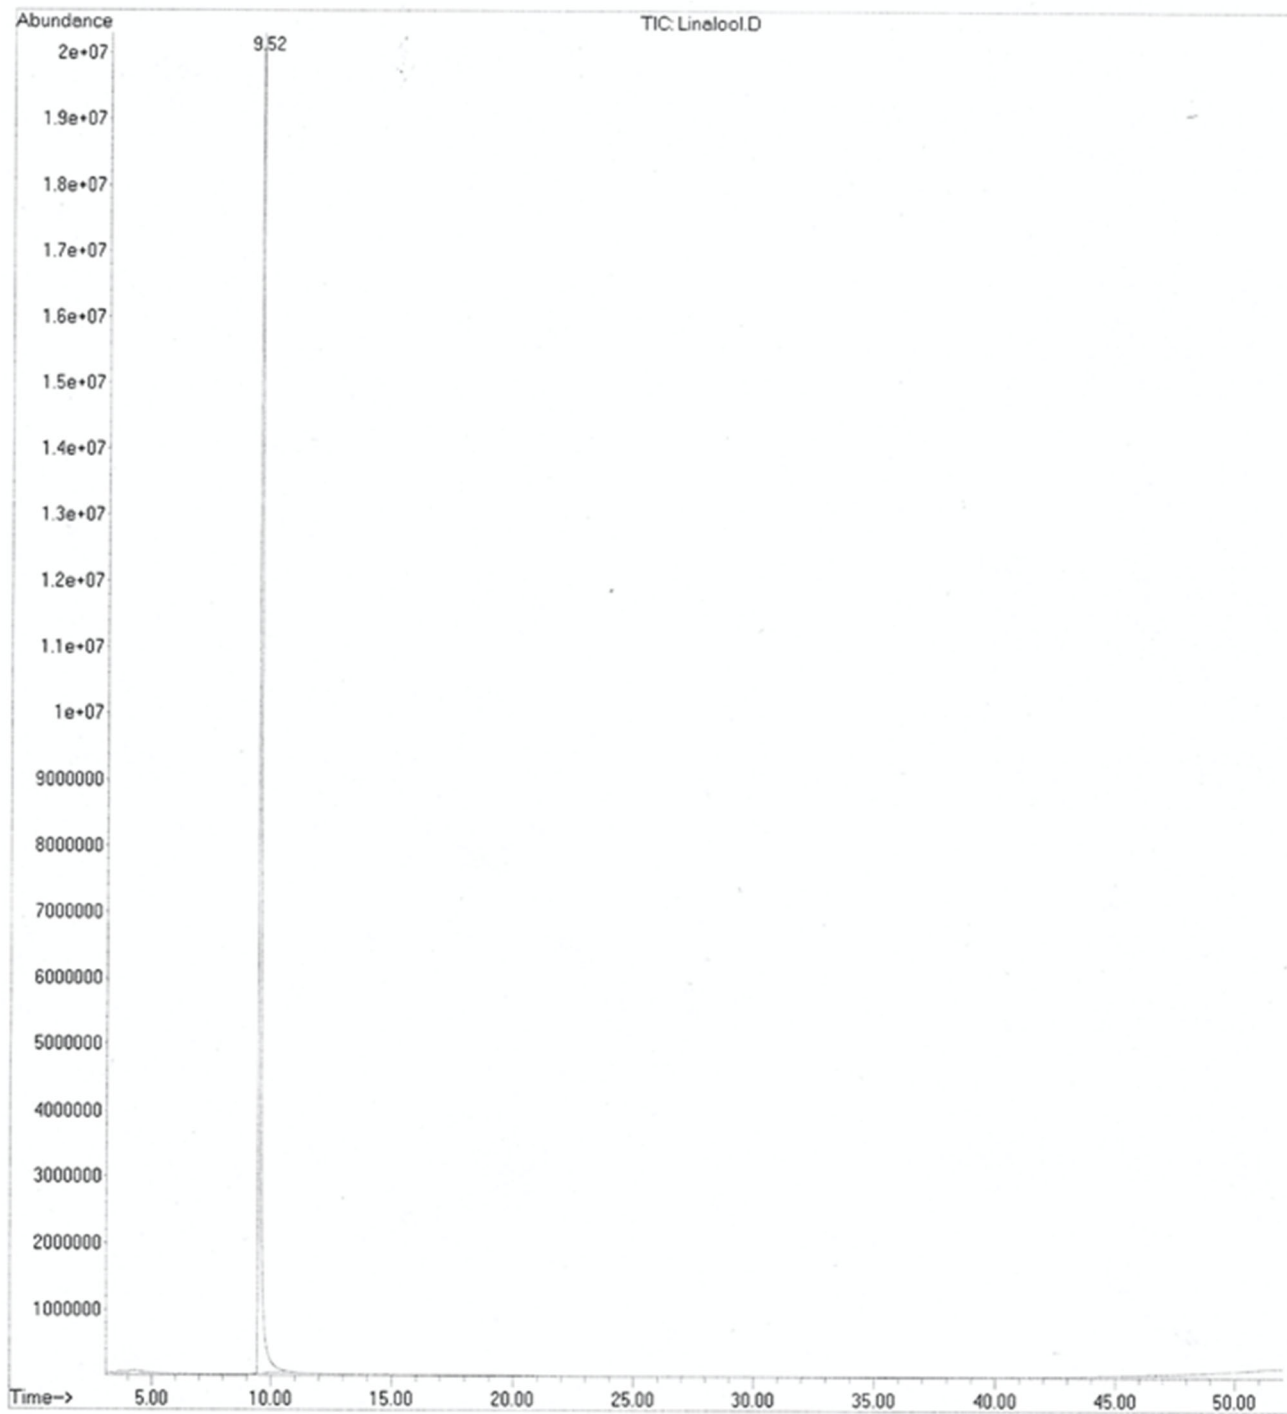

**Figure S12.** Chromatogram of linalool standard

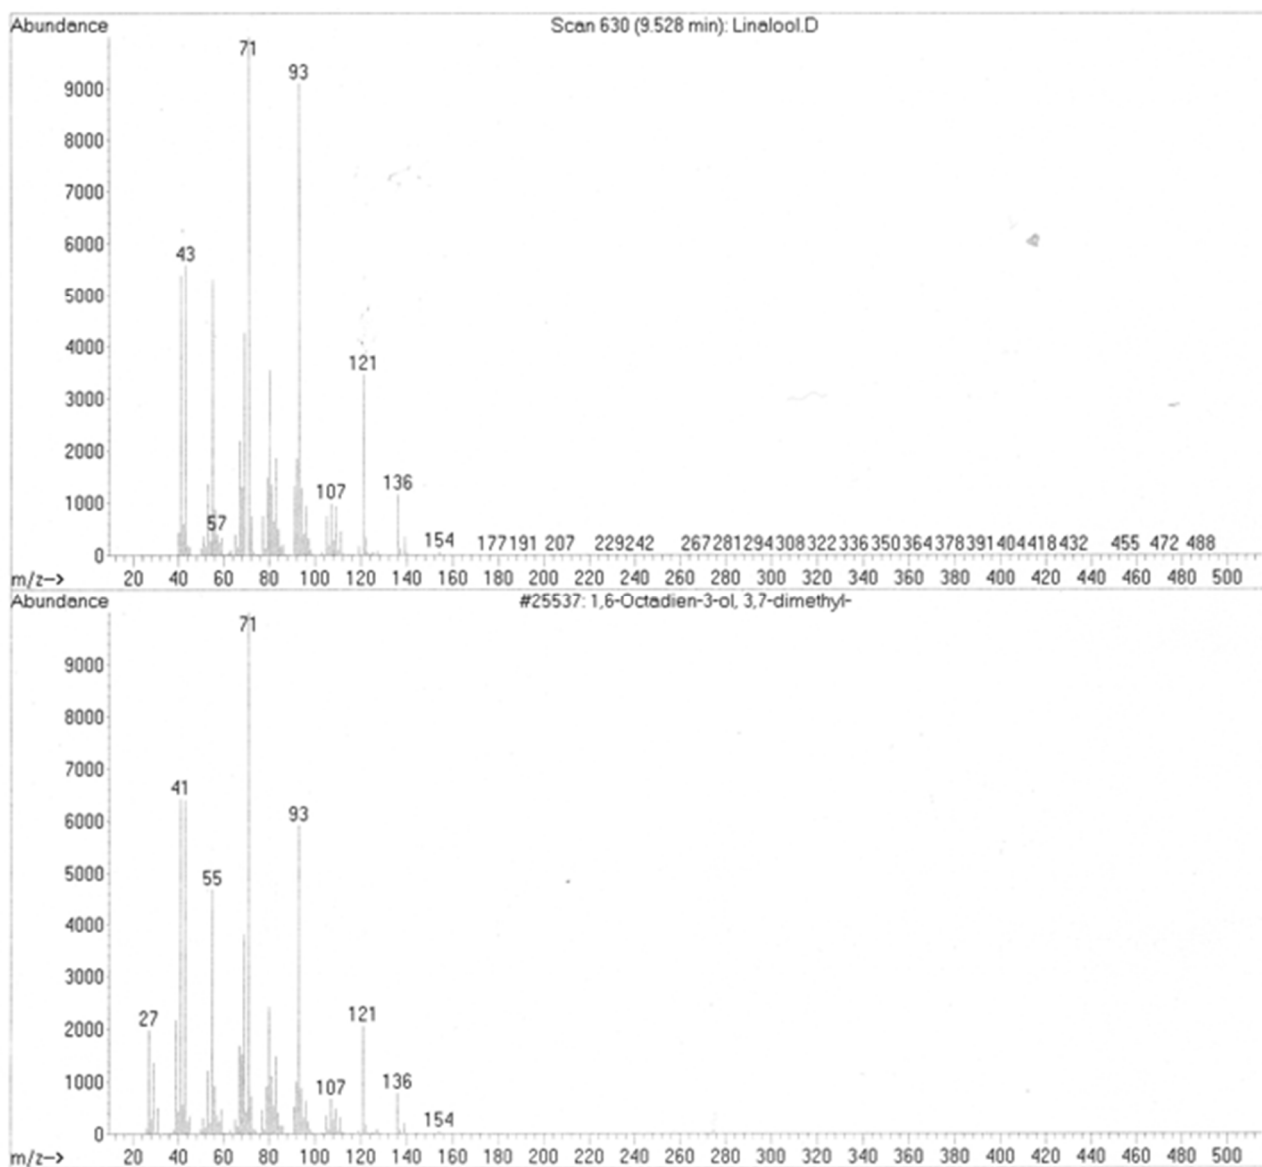

**Figure S13.** Mass spectrum of linalool, compared with linalool standard mass spectrum from NIST 02 library
